# Supplementary material for: Retinal Venular Tortuosity Jointly with Retinal Amyloid Burden Correlates with Verbal Memory Loss: A Pilot Study
Source: MDPI journal article supplement (doi:10.3390/cells10112926), 2021-10-28
Supplement: s1 [file s1]

**Table S1. Retinal Vascular Parameters correlation with of Retinal Amyloid.**

| <b>Vascular Parameter</b>                   | <b>Est (Std. Err)</b> | <b>p =</b>  |
|---------------------------------------------|-----------------------|-------------|
| <b>Total Amyloid Count</b>                  |                       |             |
| Arterial BA                                 | 0.03 (1.2)            | 0.98        |
| Venous BA                                   | 1.0 (1.3)             | 0.45        |
| Venous VTI                                  | -195 (305)            | 0.53        |
| Arterial VTI                                | -320 (758)            | 0.68        |
| Venous VII                                  | 9.49 (20.2)           | 0.64        |
| Arterial VII                                | 12.1 (20.3)           | 0.56        |
| <b>Proximal Mid-Periphery Amyloid Count</b> |                       |             |
| Arterial BA                                 | 0.07 (0.7)            | 0.92        |
| Venous BA                                   | 0.12 (0.75)           | 0.88        |
| Venous VTI                                  | -95 (178)             | 0.60        |
| Arterial VTI                                | -153 (442)            | 0.73        |
| Venous VII                                  | 12.8 (11.6)           | 0.28        |
| Arterial VII                                | 3.40 (11.9)           | 0.78        |
| <b>Distal Mid-Periphery Amyloid Count</b>   |                       |             |
| Arterial BA                                 | -0.64 (0.69)          | 0.36        |
| <b>Venous BA</b>                            | <b>1.6 (0.68)</b>     | <b>0.03</b> |
| Venous VTI                                  | 75 (178)              | 0.68        |
| Arterial VTI                                | 241 (439)             | 0.59        |
| Venous VII                                  | -14.7 (11.4)          | 0.21        |
| Arterial VII                                | -20.7 (11.2)          | 0.08        |
| <b>Posterior Pole Amyloid Count</b>         |                       |             |
| Arterial BA                                 | 0.59 (0.74)           | 0.43        |
| Venous BA                                   | -0.71 (0.80)          | 0.39        |
| Venous VTI                                  | -175 (189)            | 0.36        |
| Arterial VTI                                | -409 (468)            | 0.39        |
| Venous VII                                  | 11.3 (12.5)           | 0.37        |
| <b>Arterial VII</b>                         | <b>29.4 (11.4)</b>    | <b>0.02</b> |

**Abbreviations: BA, branching angle; VTI, vessel tortuosity index; VII, vessel inflection index.**
